# Supplementary material for: Association of level of leisure-time physical activity with risks of all-cause mortality and cardiovascular disease in an elderly Chinese population: a prospective cohort study
Source: PubMed Central journal article supplement — J Geriatr Cardiol. 2020 Oct 28;17(10):628–37. doi: 10.11909/j.issn.1671-5411.2020.10.003 (PMC7657942; doi:10.11909/j.issn.1671-5411.2020.10.003), 2020-10-28
Supplement: jgc-17-10-628-S1.pdf [file jgc-17-10-628-S1.pdf]

## Supplementary Tables

**Table 1S. Harrell C statistics for Cox regression models predicting events during follow-up.**

| Outcomes            | All participants |             | < 10 yrs     |             | ≥ 10 yrs     |             |
|---------------------|------------------|-------------|--------------|-------------|--------------|-------------|
|                     | C Statistic*     | 95% CI      | C Statistic* | 95% CI      | C Statistic* | 95% CI      |
| CVD morbidity       | 0.802            | 0.787–0.818 | 0.791        | 0.785–0.798 | 0.812        | 0.796–0.827 |
| CHD morbidity       | 0.811            | 0.798–0.823 | -            | -           | -            | -           |
| Stroke morbidity    | 0.780            | 0.763–0.796 | -            | -           | -            | -           |
| All-cause mortality | 0.743            | 0.736–0.749 | 0.765        | 0.737–0.750 | 0.751        | 0.744–0.758 |
| CVD mortality       | 0.764            | 0.753–0.774 | 0.764        | 0.754–0.775 | 0.776        | 0.765–0.788 |
| CHD mortality       | 0.786            | 0.772–0.801 | -            | -           | -            | -           |
| Stroke mortality    | 0.751            | 0.737–0.766 | -            | -           | -            | -           |

\*Refers to the Harrell C statistics were obtained by use of the STATA stcox postestimation command “estat concordance” and 95% CIs were obtained by use of the “somersd” package in STATA 16.0. CHD: coronary heart disease; CI: confidence interval; CVD: cardiovascular disease.

**Table 2S. Association of LTPA categories and risk of CVD morbidity according to subgroups (< 10 years and ≥ 10 years).**

| Variables          | Inactive  | Insufficiently active | Sufficiently active | Highly active     | Very highly active |
|--------------------|-----------|-----------------------|---------------------|-------------------|--------------------|
| <b>&lt; 10 yrs</b> |           |                       |                     |                   |                    |
| Events             | 4,569     | 808                   | 895                 | 228               | 91                 |
| Person-years       | 111,206   | 22,195                | 27,310              | 8,058             | 2,929              |
| Incidence          | 41.09     | 36.40                 | 32.77               | 28.30             | 31.06              |
| Model 1            | Reference | 0.86 (0.80–0.93)*     | 0.78 (0.72–0.83)*   | 0.69 (0.60–0.79)* | 0.75 (0.61–0.92)*  |
| Model 2            | Reference | 0.89 (0.83–0.96)*     | 0.85 (0.79–0.92)*   | 0.80 (0.70–0.91)* | 0.90 (0.73–1.11)*  |
| Model 3            | Reference | 0.91 (0.84–0.98)*     | 0.87 (0.81–0.94)*   | 0.81 (0.71–0.93)* | 0.89 (0.72–1.10)*  |
| <b>≥ 10 yrs</b>    |           |                       |                     |                   |                    |
| Events             | 4,569     | 94                    | 107                 | 53                | 12                 |
| Person-years       | 111,206   | 3,007                 | 3,779               | 2,266             | 496                |
| Incidence          | 41.09     | 31.26                 | 28.32               | 23.39             | 24.18              |
| Model 1            | Reference | 0.71 (0.58–0.87)*     | 0.69 (0.57–0.83)*   | 0.57 (0.44–0.75)* | 0.56 (0.32–0.99)*  |
| Model 2            | Reference | 0.77 (0.65–0.94)*     | 0.72 (0.60–0.87)*   | 0.70 (0.53–0.92)* | 0.72 (0.41–1.27)*  |
| Model 3            | Reference | 0.76 (0.62–0.93)*     | 0.72 (0.59–0.88)*   | 0.70 (0.53–0.92)* | 0.75 (0.42–1.33)*  |

Model 1: adjusted for sex and age. Model 2: adjusted for variables in Model 1 plus current smoking, alcohol consumption, BMI, medical history of T2DM, SBP, DBP, RHR, FPG, TC, TG and HDL-C. Model 3: competing-risks survival regression adjusted covariates were the same as Model 2. \*Presented as HR (95% CI). BMI: body mass index; CI: confidence interval; CVD: cardiovascular disease; DBP: diastolic blood pressure; FPG: fasting plasma glucose; HDL-C: high-density lipoprotein cholesterol; HR: hazards ratio; LTPA: leisure-time physical activity; RHR: resting heart rate; SBP: systolic blood pressure; TC: total cholesterol; TG: triglyceride; T2DM: type 2 diabetes mellitus.

**Table 3S. Association between LTPA and risk of all-cause and CVD mortality according to subgroups (< 10 years and ≥ 10 years).**

| Variables | Inactive  | Insufficiently active | Sufficiently active | Highly active     | Very highly active |
|-----------|-----------|-----------------------|---------------------|-------------------|--------------------|
| All-cause |           |                       |                     |                   |                    |
| < 10 yrs  |           |                       |                     |                   |                    |
| Events    | 4,249     | 767                   | 782                 | 193               | 78                 |
| Model 1   | Reference | 0.92 (0.85–0.99)*     | 0.81 (0.75–0.88)*   | 0.78 (0.67–0.90)* | 0.81 (0.61–0.97)*  |
| Model 2   | Reference | 0.92 (0.86–0.99)*     | 0.83 (0.76–0.89)*   | 0.78 (0.68–0.90)* | 0.84 (0.63–0.99)*  |
| ≥ 10 yrs  |           |                       |                     |                   |                    |
| Events    | 4,249     | 95                    | 99                  | 51                | 10                 |
| Model 1   | Reference | 0.72 (0.59–0.88)*     | 0.79 (0.65–0.96)*   | 0.68 (0.52–0.90)* | 0.56 (0.30–0.89)*  |
| Model 2   | Reference | 0.75 (0.61–0.92)*     | 0.79 (0.65–0.96)*   | 0.71 (0.54–0.94)* | 0.57 (0.31–0.91)*  |
| CVD       |           |                       |                     |                   |                    |
| < 10 yrs  |           |                       |                     |                   |                    |
| Events    | 1,434     | 233                   | 248                 | 47                | 29                 |
| Model 1   | Reference | 0.82 (0.72–0.95)*     | 0.76 (0.66–0.87)*   | 0.55 (0.41–0.73)* | 0.90 (0.63–1.31)*  |
| Model 2   | Reference | 0.83 (0.72–0.95)*     | 0.81 (0.70–0.92)*   | 0.59 (0.44–0.79)* | 1.03 (0.71–1.49)*  |
| ≥ 10 yrs  |           |                       |                     |                   |                    |
| Events    | 1,434     | 25                    | 28                  | 12                | 4                  |
| Model 1   | Reference | 0.57 (0.39–0.85)*     | 0.65 (0.45–0.94)*   | 0.47 (0.27–0.83)* | 0.66 (0.25–1.76)*  |
| Model 2   | Reference | 0.66 (0.45–0.98)*     | 0.69 (0.47–0.98)*   | 0.56 (0.32–0.99)* | 0.77 (0.29–2.06)*  |

Model 1: adjusted for sex and age. Model 2: adjusted for variables in Model 1 plus current smoking, alcohol consumption, BMI, medical history of T2DM, SBP, DBP, RHR, FPG, TC, TG and HDL-C. \*Presented as HR (95% CI). BMI: body mass index; CI: confidence interval; CVD: cardiovascular disease; DBP: diastolic blood pressure; FPG: fasting plasma glucose; HDL-C: high-density lipoprotein cholesterol; HR: hazards ratio; LTPA: leisure-time physical activity; RHR: resting heart rate; SBP: systolic blood pressure; TC: total cholesterol; TG: triglyceride; T2DM: type 2 diabetes mellitus.

**Table 4S. Tests of non-linearity of LTPA restricted cubic splines.**

| Outcomes            | P-value          |          |          |
|---------------------|------------------|----------|----------|
|                     | All participants | < 10 yrs | ≥ 10 yrs |
| CVD morbidity       | < 0.001          | 0.003    | 0.018    |
| CHD morbidity       | 0.068            | -        | -        |
| Stroke morbidity    | < 0.001          | -        | -        |
| All-cause mortality | 0.078            | 0.085    | 0.062    |
| CVD mortality       | < 0.001          | < 0.001  | 0.045    |
| CHD mortality       | 0.034            | -        | -        |
| Stroke mortality    | 0.002            | -        | -        |

CHD: coronary heart disease; CVD: cardiovascular disease; LTPA: leisure-time physical activity.

**Table 5S. Overall tests of association (likelihood ratio test) between LTPA and outcomes.**

| Outcomes            | All participants |         | < 10 yrs |         | ≥ 10 yrs |         |
|---------------------|------------------|---------|----------|---------|----------|---------|
|                     | $\chi^2$         | P-value | $\chi^2$ | P-value | $\chi^2$ | P-value |
| CVD morbidity       | 2232.03          | < 0.001 | 2132.88  | < 0.001 | 1686.13  | < 0.001 |
| CHD morbidity       | 1806.92          | < 0.001 | -        | -       | -        | -       |
| Stroke morbidity    | 879.55           | < 0.001 | -        | -       | -        | -       |
| All-cause mortality | 4999.68          | < 0.001 | 4793.47  | < 0.001 | 3769.91  | < 0.001 |
| CVD mortality       | 1859.30          | < 0.001 | 1785.69  | < 0.001 | 1473.97  | < 0.001 |
| CHD mortality       | 1114.74          | < 0.001 | -        | -       | -        | -       |
| Stroke mortality    | 839.16           | < 0.001 | -        | -       | -        | -       |

CHD: coronary heart disease; CVD: cardiovascular disease; LTPA: leisure-time physical activity.
